1 **Laminarin-triggered defence responses are geographically dependent for**  
2 **natural populations of *Solanum chilense*.**

3

4

5

6 Parvinderdeep S. Kahlon<sup>1,†</sup>, Andrea Förner<sup>1</sup>, Michael Muser<sup>1</sup>, Mhaned Oubounyt<sup>2</sup>, Michael  
7 Gigl<sup>3</sup>, Richard Hammerl<sup>3</sup>, Jan Baumbach<sup>2,4</sup>, Ralph Hückelhoven<sup>1</sup>, Corinna Dawid<sup>3</sup> and Remco  
8 Stam<sup>5,\*</sup>

9

10 **Short title:** diversity in laminarin responses in wild tomato

11

12 <sup>1</sup>Chair of Phytopathology, TUM School of Life Sciences, Technical University of Munich,  
13 Emil-Ramann-Str. 2, 85354, Freising, Germany

14 <sup>2</sup>Chair of Computational Systems Biology, University of Hamburg, Notkestrasse 9, 22607,  
15 Hamburg, Germany

16 <sup>3</sup>Chair of Food Chemistry and Molecular Sensory Science, TUM School of Life Sciences,  
17 Technical University of Munich, Lise-Meitner-Str. 34, 85354 Freising, Germany

18 <sup>4</sup>Computational BioMedicine lab, Institute of Mathematics and Computer Science, University  
19 of Southern Denmark, Campusvej 55, Odense, Denmark

20 <sup>5</sup>Department for Phytopathology and Plant Protection, Institute for Phytopathology, Kiel  
21 University, Hermann Rodewald Str 9, 24118 Kiel, Germany

22

23 [parvinderdeep.kahlon@wur.nl](mailto:parvinderdeep.kahlon@wur.nl)

24 [andrea.foerner@gmx.de](mailto:andrea.foerner@gmx.de)

25 [michael.muser@gmx.net](mailto:michael.muser@gmx.net)

26 [mhaned.oubounyt@uni-hamburg.de](mailto:mhaned.oubounyt@uni-hamburg.de)

27 [michael.gigl@tum.de](mailto:michael.gigl@tum.de)

28 [richard-hammerl@web.de](mailto:richard-hammerl@web.de)

29 [jan.baumbach@uni-hamburg.de](mailto:jan.baumbach@uni-hamburg.de)

30 [hueckelhoven@wzw.tum.de](mailto:hueckelhoven@wzw.tum.de)

31 [corinna.dawid@tum.de](mailto:corinna.dawid@tum.de)

32 [remco.stam@phytomed.uni-kiel.de](mailto:remco.stam@phytomed.uni-kiel.de)

33

34 Date of Submission: 10.2022

35 Number of tables: 1

36 Number of figures: 6

37 Word count: 4900

38 Supplemental data: 6 figures, 18 tables

39

40

41

42 \*Author for contact: Remco Stam, Department for Phytopathology and Plant Protection,

43 Institute for Phytopathology, Kiel University, Hermann Rodewald Str 9, 24118 Kiel,

44 Germany Email: [remco.stam@phytomed.uni-kiel.de](mailto:remco.stam@phytomed.uni-kiel.de)

45 †Current address: Laboratory of Plant Physiology, Wageningen University and Research,

46 Droevendaalsesteeg 1, 6708 PB Wageningen, The Netherlands

47

## 48 **Highlight**

49 Large-scale screenings reveal geographically distinct intraspecific differences in the  
50 dominant physiological pathogen defence responses upon glucan elicitor treatment in a wild  
51 tomato species.

52

## 53 **Abstract**

54 Natural plant populations are polymorphic and show intraspecific variation in resistance  
55 properties against pathogens. The activation of the underlying defence responses can depend  
56 on variation in perception of pathogen-associated molecular patterns or elicitors. To dissect  
57 such variation, we evaluated the responses induced by laminarin, (a glucan, representing an  
58 elicitor from oomycetes) in the wild tomato species *Solanum chilense* and correlated this to  
59 observed infection frequencies of *Phytophthora infestans*.

60 We measured reactive oxygen species burst and levels of diverse phytohormones upon  
61 elicitation in 83 plants originating from nine populations. We found high diversity in basal  
62 and elicitor-induced levels of each component. Further we generated linear models to explain  
63 the observed infection frequency of *P. infestans*. The effect of individual components differed  
64 dependent on the geographical origin of the plants. We found that the resistance in the  
65 southern coastal region, but not in the other regions is directly correlated to ethylene  
66 responses and confirmed this positive correlation using ethylene inhibition assays.

67 Our findings reveal high diversity in the strength of defence responses within a species and  
68 the involvement of different components with a quantitatively different contribution of  
69 individual components to resistance in geographically separated populations of a wild plant  
70 species.

71

72 **Keywords:** Diversity; Early Immune Response; Ethylene; Laminarin; Phytohormones;  
73 *Phytophthora infestans*; Reactive Oxygen Species; Resistance; *Solanum chilense*; Tomato

## 74 Introduction

75 Plant defence responses against pathogens in natural populations are often polymorphic  
76 (Kahlon and Stam, 2021a). The resistance of the host can result from the major resistance  
77 proteins or from polygenic defence mechanisms against the pathogen (Vanderplank, 1963).  
78 The later type of resistance mechanism is often considered as a basal defence, whereas major  
79 gene-mediated resistance is observed as pathogen genotype dependent. Genes encoding  
80 nucleotide-binding domain leucine-rich repeat-containing proteins (NLR) are one example of  
81 major resistance genes. *NLR* genes have been studied in natural plant populations and are  
82 reported to be diverse at the genetic level (Stam *et al.*, 2019a, Van de Weyer *et al.*, 2019;  
83 Witek *et al.*, 2021). Similarly, members of the receptor-like proteins (RLPs) family show  
84 intraspecific variation in the presence-absence of defence responses or variability in  
85 expression patterns of these genes (Van der Hoorn *et al.*, 2001; Kruijt *et al.*, 2005; Kahlon *et*  
86 *al.*, 2020, Steidele and Stam, 2020). In many cases, major gene mediated resistance is  
87 complete. By contrast, basal resistance is defined as quantitative and pathogen race-non-  
88 specific (Vanderplank, 1963). This might partially be explained by its polygenic nature, and  
89 because underlying defence reactions can be activated upon exposure to elicitors or  
90 conserved pathogen-associated molecular patterns (PAMPs). Flagellin peptides (flg22, flgII-  
91 28) and chitin have been the dominant PAMPs for studies on resistance mechanisms in plants  
92 against pathogens from bacterial and fungal lineages respectively. Many additional PAMPs  
93 have been identified e.g. VmE02 homologs, produced by various fungi and oomycetes, can  
94 trigger immunity response in *N. benthamiana* (Nie *et al.*, 2018) and peptide elicitor fractions  
95 from several *Fusarium* spp. activate basal defence mechanisms in *Arabidopsis thaliana*  
96 (Coleman *et al.*, 2021). One other example is laminarin, which is perceived in different plant  
97 species like *Nicotiana tabacum* (Klarzynski *et al.*, 2000; Ménard *et al.*, 2004), Grapevine,  
98 *Vitis vinifera* (Aziz *et al.*, 2003), *A. thaliana* (Ménard *et al.*, 2004), tea, *Camellia sinensis*  
99 (Xin *et al.*, 2019), *Nicotiana benthamiana*, *Hordeum vulgare*, *Brachypodium distachyon*  
100 (Wanke *et al.*, 2020) and Olive, *Olea europaea* (Tziros *et al.*, 2021). Laminarin is an  
101 oligomeric  $\beta$ -1,3-glucan with  $\beta$ -1,6-glucan branches.  $\beta$ -1,3 and  $\beta$ -1,6-glucan are the major  
102 components of the oomycete cell wall (Aronson *et al.*, 1967) and may induce defence  
103 responses similar to those provoked by elicitors from the oomycete lineage.

104

105 Several molecular mechanisms have been shown to play an important role in basal defence  
106 responses. Many of these responses happen shortly upon contact with the pathogen. In some

107 plant-pathogen interactions basal immune responses can be quantified within the first minutes  
108 of the interaction with the pathogen or pathogen-specific molecules by measuring reactive  
109 oxygen species (ROS) production (Torres *et al.*, 2006). The fine-tuning in the production of  
110 ROS is one important cue toward activating resistance mechanisms which lead to the  
111 production of various phytohormones or activation of downstream defence regulators  
112 (Ramirez-Prado *et al.*, 2018). Roberts *et al.* (2019) showed the amount of ROS production  
113 varied when different tomato (*Solanum lycopersicum*) accessions were treated with flagellin  
114 peptides (flg22, flgII-28). Besides the production of ROS, phytohormones present or induced  
115 in the plant can greatly influence the resistance outcome. A higher level of salicylic acid (SA)  
116 is important in activating defence response in cultivated tomato leaves against *P. infestans*  
117 (Jeun *et al.*, 2000). Genes involved in ethylene (ET) and SA pathways are important in *N.*  
118 *benthamiana* after infection with *P. infestans* (Takemoto *et al.*, 2018). A study on potato  
119 shows that upon infection with *P. infestans* large sets of genes are upregulated at multiple  
120 time points post-inoculation. These included key marker genes involved in the jasmonic acid  
121 (JA) acid signalling pathway and genes involved in primary and secondary metabolite  
122 pathways (Tian *et al.*, 2006). In cultivated tomato the negative role of abscisic acid (ABA) in  
123 resistance against *Botrytis cinerea* is regulated by repressing SA signalling (Audenaert *et al.*,  
124 2002). Whereas resistance against *Alternaria solani* is enhanced upon exogenous ABA  
125 application through defence-related gene activation and defense-related enzymatic activity of  
126 phenylalanine ammonia-lyase (PAL), polyphenol oxidase (POD) and peroxidase (PPO)  
127 (Song *et al.*, 2011). Exogenous application of indoleacetic acid (IAA) in the soil resulted in  
128 *Fusarium oxysporum lycopersici* disease suppression in tomato plants (Sharaf and Farang,  
129 2004).

130 The different components of the phytohormone signalling pathways can have positive or  
131 negative feedback effects on each other and thus form a complex interactive signalling  
132 network (Pieterse *et al.*, 2009). These complex network topologies generated an hypothesis  
133 that one or multiple components involved in the resistance need to pass a certain threshold, in  
134 order for defence to be functional (Windram and Denbi 2015). Which factors are dominant  
135 might differ dependent on the origin of a plant or population and the pathogen in question.  
136 Such differences in dominant effective defence responses in different *A. thaliana* accessions  
137 are shown by Velásquez *et al.* (2017) against the bacterial pathogen *Pseudomonas syringae*  
138 pv. tomato (*Pst*) DC3000. They found that *Pseudomonas syringae* pv. tomato (*Pst*) DC3000  
139 resistance was shown to be mainly mediated by an increased level of the phytohormone  
140 salicylic acid (SA) in three accessions, whereas other mechanisms were dominant in the other

141 resistant accessions. Another study showed that between six *A. thaliana* accessions large  
142 variation in JA and SA- associated basal resistance resulted in varied resistance against the  
143 necrotrophic pathogen *Plectosphaerella cucumerine* and the hemibiotrophic bacterium *P.*  
144 *syringae* respectively (Ahmad *et al.*, 2011).

145 We used a wild tomato species *Solanum chilense* to elucidate molecular cues behind the  
146 diversity in resistance against the oomycete, *P. infestans* (Stam *et al.*, 2017; Kahlon *et al.*,  
147 2021). *S. chilense* is a suitable organism to study the variation of molecular responses  
148 associated with basal defence mechanisms. Populations of *S. chilense* are geographically  
149 structured in four distinct groups based on genomic studies (Böndel *et al.*, 2015; Stam *et al.*,  
150 2019a). The two southern groups are recent expansions of the species, are genetically more  
151 divergent and might be developing into new subspecies (Raduski and Igit, 2021). Thus the  
152 system provides a strong genetic structure. Previously, we found variation in defence  
153 responses against the apoplastic fungal leaf pathogen *Cladosporium fulvum* (syn. *Fulvia*  
154 *fulva*, *Passalora fulva*), with complete loss of pathogenic protein recognition in plants from  
155 the southern groups (Kahlon *et al.*, 2020). In order to assess phenotypic variation in  
156 resistance, we also quantified the number of successful infection events in *S. chilense* plants  
157 after drop inoculation with various other leaf pathogens. We showed clear differences in the  
158 frequency of successful infections after inoculation of three common filamentous pathogens  
159 in different *S. chilense* populations (Stam *et al.*, 2017). In a recent report (Kahlon *et al.*, 2021)  
160 we showed that differences in *P. infestans* resistance between the geographically distinct  
161 populations of *S. chilense* are predominantly driven by the host genotype and can likely be  
162 attributed to differences in basal resistance, rather than isolate-specific resistance.

163 Here, we aim to dissect the various possible immune responses in *S. chilense* populations. We  
164 specifically investigate the early basal defence responses in *S. chilense* upon challenge with  
165 the nonspecific elicitor laminarin. We confirm that laminarin elicits a subset of defence  
166 responses triggered by *P. infestans*, we report high diversity in several key regulators of basal  
167 immune responses in *S. chilense* within and between populations of the species within the  
168 first hours of infection, and we assess their individual and joint effect on the interaction  
169 outcome, by comparing these results to our previously published infection data (Kahlon *et al.*,  
170 2021).

171

## 172 **Materials and methods**

### 173 **Plants material used and maintained**

174 We used 83 plants of *S. chilense* originating from nine populations (accessions) (8-10 plants  
175 each): LA1958, LA1963, LA2747, LA2932, LA3111, LA3786, LA4107, LA4117A and  
176 LA4330. The seeds of these populations were procured from the C. M. Rick Tomato Genetics  
177 Resource Center of the University of California, Davis (TGRC UC-Davis,  
178 <http://tgrc.ucdavis.edu/>) where the populations were originally collected as random collection  
179 of seeds from the wild populations and are now maintained and propagated at the TGRC to  
180 maintain genetic diversity. Procured seeds were sown and plants were maintained in  
181 controlled greenhouse conditions (16h light and 24°C temperature at daytime and 18-20°C at  
182 night) at TUM's plant technology center. Each plant used in this study was at least a year old.  
183 Plants were maintained throughout the experiments by cutting them every two weeks. Each  
184 population used in this study represents one of four geographical locations of the species  
185 habitat and were originally collected during different years from wild populations. Each  
186 individual plant within a population is genetically unique.

187

### 188 **Evaluation of laminarin potential to activate early immune responses similar to *P.*** 189 ***infestans* using 3' RNAseq**

190 We selected the central population LA3111 to evaluate differentially expressed genes in the  
191 transcriptome upon challenging with *P. infestans* Pi100 (3000 sporangia/ml) and laminarin  
192 (1mg/ml, Sigma-Aldrich) treatment (using spray inoculation). We use LA3111 population  
193 because the reference genome of *S. chilense* was generated from an individual from this  
194 population (Stam *et al.*, 2019b). To measure the general defence responses in the population,  
195 the experiment was done on nine plants and all plants were pooled per treatment for the RNA  
196 extraction. Detached leaves were kept upside down in plastic boxes containing wet tissue  
197 beds and treated with water, laminarin or *P. infestans*. The boxes were kept at 18-20°C for 3  
198 hours and samples were taken and snap-frozen in liquid nitrogen. RNA was isolated using  
199 Qiagen® RNeasy plant mini kit according to the instruction manual. Each treatment consisted  
200 of pooled samples of nine plants and four technical replicates of each treatment.

201 3'RNA libraries were prepared according to the manufacturer's protocol using the QuantSeq  
202 3'mRNA-Seq Library Prep Kit (Lexogen, Vienna, Austria). Sequencing was performed on a  
203 HiSeq2500 (Illumina, San Diego, CA, USA) with single-end 100bp reads using Rapid SBS  
204 v2 chemistry. The raw sequencing reads in FastQ format were trimmed to remove adapter  
205 sequences using Trimmomatic v0.39 (Bolger *et al.*, 2014). The reads were quality filtered and  
206 trimmed using the following settings: LEADING:3, SLIDINGWINDOW:4:15, MINLEN:40.  
207 HISAT2 (Kim *et al.*, 2015) was used to align sequencing reads to a reference genome (Stam

208 *et al.*, 2019b). After alignment, featureCounts (Liao *et al.*, 2014) was used to identify the  
209 number of reads that mapped to genes. For feature Counts, all entries tagged as 'gene' were  
210 extracted from the gff annotation files and by adjusting the gene\_id and transcript\_id  
211 identifiers, this gene list was converted into a gtf annotation file. The downstream region of  
212 every gene was extended by 1kb (the extension stops when it hits the next gene start site).  
213 FeatureCounts was modified to search for the tag 'gene' instead of the default 'exon' tag.  
214 Differential gene expression analysis was carried out using the R package DESeq2 (Love *et*  
215 *al.*, 2014). DESeq2 uses the output of featureCounts to estimate the fold change in gene  
216 expression between different treatment groups. Default parameters from the DESeq2 package  
217 were applied and differentially expressed genes (DEGs) showing adjusted  $p$ -value<0.05 were  
218 considered significant.

219 Gene Ontology (GO) enrichment analysis was based on previously annotated ontologies  
220 (Stam *et al.*, 2019b). GO terms were selected for all candidate genes. The Background  
221 frequency of each GO term is the number of genes annotated to this GO term in all genes,  
222 while sample frequency is the number of genes annotated to that GO term in the list of DEGs  
223 in this sample.

224 For the manual inspection of the functions of the differentially expressed overlapping gene  
225 candidates in laminarin and *P. infestans* treated samples, we performed a BLAST search,  
226 extracted gene names and functional annotation from the best hits and if needed, performed a  
227 literature search for papers that described the functions of the described gene candidates. (See  
228 10.5281/zenodo.5101308)

229

### 230 **Gene expression analysis of the key indicators of phytohormones pathways via qPCR**

231 To independently evaluate phytohormone regulation in response to laminarin (1mg/ml)  
232 elicitation we tested the expression level of key indicators of three well-known defence  
233 phytohormones *1-aminocyclopropane-1-carboxylic acid synthases 2*, *ACS2* from the ET  
234 pathway (Gravino *et al.*, 2015), *isochorismate synthase*, *ICS* (Di *et al.*, 2017) and  
235 *phenylalanine ammonia-lyase*, *PAL* (Peng *et al.*, 2004) from the SA pathway and  
236 *lipxygenase D*, *LOXD*; (Heitz *et al.*, 1997) from the JA pathway, in individual plant leaf  
237 discs of *S. chilense* upon treatment with laminarin and compared it to mock-treated (water)  
238 leaf discs. *S. chilense* reference names of the genes are provided in Table S1.

239 Leaf discs of the plant LA1963-02 (chosen due to its high resistance observed in Kahlon *et*  
240 *al.*, 2021) were treated with laminarin and MilliQ-H<sub>2</sub>O treated leaf discs served as control.  
241 Experiments were performed on three different dates in three independent replicates each.



242 Samples were treated for 1.5 hours, snap-frozen in liquid nitrogen and ground to a fine  
243 powder with a mortar and pestle. RNA was extracted using the Qiagen® RNeasy plant mini  
244 kit according to the instruction manual. cDNA synthesis was performed using a Qiagen  
245 QunatiTect® reverse transcriptase kit according to the instruction manual. Quantitative PCR  
246 (qPCR) was performed on the synthesised cDNA using Takyon™ Low ROX SYBR® master  
247 mix ddTTP blue (Eurogentec Liège, Belgium). qPCR was performed in three technical  
248 replicates and a non-template control was included. Primer pairs for each tested gene are  
249 indicated in Table S1, *TIP-41* (Fisher *et al.*, 2013; Nosenko *et al.*, 2016) was used as a  
250 housekeeping gene for normalization and primer efficiency was performed for all the primer  
251 pairs and are shown in Table S1. The PCR reaction comprised of 10µl SYBR Green-ROX  
252 Mix, 0.3µM of forward primer and 0.3µM of reverse primer, 3µl of cDNA and volume was  
253 adjusted to 20µl with MilliQ-H<sub>2</sub>O. The thermal cycling profile was set to a hot start at 95°C  
254 for 3 minutes, followed by 40 cycles of amplification (95°C for 30 seconds, 60°C for 30  
255 seconds, 72°C for 1 minute), 1 cycle melting (95°C for 30 seconds, 65°C for 30 seconds,  
256 95°C for 30 seconds), and in the end 1 cycle at 72°C for 10 minutes. Melting curve  
257 temperatures were recorded at the end of the cycle for quality control. Data were evaluated  
258 with the software Agilent Aria MX 1.7 and relative gene expression was calculated based on  
259 the Livak and Schmittgen method (2001).

## 260 **ROS production measurement**

261 To measure ROS production upon elicitation with laminarin, we performed a 96-well plate  
262 assay based on chemiluminescence as described by Kahlon and Stam (2021b). Leaf discs  
263 from leaves of mature plants were made with a biopsy punch (4mm, KAI Medical Solingen,  
264 Germany) and incubated in white 96-well flat-bottom plate overnight in 200µl of 20mM  
265 MOPS (pH 7.5) at room temperature. The next day buffer was removed and wells were  
266 supplemented with 75µl HRP mix (10µM horseradish peroxidase (HRP) and 10µM L012). A  
267 baseline reading was performed for the initial 10 minutes using a Luminoskan Ascent  
268 (Thermo Scientific) and then laminarin (1mg/ml final concentration) dissolved in MOPS was  
269 added to the plate at 4 wells/plant. For each population, the assay was performed on three  
270 different dates with four technical replicates each for treatment and mock (MOPS) per date.  
271 In addition, we performed ROS production measurements with flg22 at a final concentration  
272 of 500nM in population LA4330 (7 plants) to compare it with specificity of laminarin in ROS  
273 production. Normalization of data was performed by first averaging over the initial 6-10  
274 minutes baseline reading, followed by normalization to the mock treatment for the treated

275 leaf discs.

276

277 **Phytohormone measurements: ET measurements**

278 Leaf discs were obtained with a 4mm biopsy punch and incubated overnight in Petri dishes  
279 containing milliQ-H<sub>2</sub>O at room temperature. Following overnight incubation, three leaf discs  
280 were added to glass vials (5ml) containing 300µl of milliQ-H<sub>2</sub>O. Laminarin was added in a  
281 final concentration of 1mg/ml to 3 glass vials (samples) containing three leaf discs of one  
282 plant and milliQ-H<sub>2</sub>O in three separate glass vials containing leaf discs for same plant served  
283 as a negative control. Upon addition of elicitor or water, the glass vials were sealed with septa  
284 (Carl Roth GmbH). Samples were incubated for three hours at a shaker at ~ 20-50 rpm  
285 (Heidolph Polymax 2040). 3 hours post-incubation, 1ml of air was retrieved from each  
286 samples with a syringe through the rubber cap and injected into a Varian 3300 gas  
287 chromatography machine containing AlO<sub>3</sub> column with length 1m and 225°C detector  
288 temperature and 80°C column and injector temperature. The gases used for the separation of  
289 ET from the sample were H<sub>2</sub>, N<sub>2</sub> and O<sub>2</sub> at 0.5 MPa each. The amount of ET was calculated  
290 based on the standard calculation as developed by Von Kruedener *et al.* (1994) using the area  
291 under the curve (AUC). In total, we measured up to nine samples per plant on three different  
292 dates, each date containing up to three samples.

293

294 **Phytohormone and their derivatives measurements: Measurement of SA, JA, ABA,  
295 IAA, phaseic acid (PA) and dihydrophaseic acid (DPA):**

296 Samples for measurements of these six compounds were also prepared based on the leaf disc  
297 treatment method. 150-200 leaf discs were made per plant using a 4mm diameter biopsy  
298 punch and incubated overnight in Petri dishes containing milliQ-H<sub>2</sub>O. The next day for each  
299 plant a 6-well plate filled with milliQ-H<sub>2</sub>O was prepared for elicitation containing 25-30 leaf  
300 discs per well. Three wells were elicited with laminarin (1mg/ml) and in the remaining three  
301 wells milliQ-H<sub>2</sub>O was added as a control. The plates were incubated for three hours at a  
302 shaker at ~ 20-50 rpm. Following the treatments, the leaf discs were transferred to 2ml  
303 Eppendorf tubes and residual water was pipetted out before snap-freezing the samples in  
304 liquid nitrogen.

305 Fine powder from the plant material was obtained after grinding the frozen leaf discs with  
306 mortar and pestle in liquid nitrogen. The samples were then processed for extraction of the  
307 phytohormones and their derivatives as described by Chaudhary *et al.* (2020), with minor  
308 modifications. 50-200mg ground material was transferred to a 2ml bead beater tube (CKMix-

309 2ml, Bertin Technologies, Montigny-le-Bretonneux, France). 20 $\mu$ l of internal standard  
310 solution containing indoleacetic acid-d<sub>2</sub> (Sigma Aldrich, Steinheim, Germany) (2.5 $\mu$ g/ml),  
311 salicylic acid-d<sub>4</sub> (Olchemim, Olomouc, Czech Republic) (2.5 $\mu$ g/ml), (+) cis, trans-abscisic  
312 acid-d<sub>6</sub> (Sigma Aldrich, Steinheim, Germany) (2.5 $\mu$ g/ml), and (-) trans-jasmonic acid-d<sub>5</sub>  
313 (25 $\mu$ g/ml) (Santa Cruz, Dallas, TX, USA) were dissolved in acetonitrile and added to the  
314 samples and incubated for 30 minutes at room temperature. Following that 1ml of ice-cold  
315 ethyl acetate (Art. 864, Merck, Darmstadt, Germany) was added to the samples and stored  
316 overnight at -20°C. The next day samples were shaken for 3X20 seconds using the bead  
317 beater (Precellys Homogenizer, Bertin Technologies, Montigny-le-Bretonneux, France) at  
318 6000rpm with 40 seconds breaks in-between. The material was then filtered with a 0.45 $\mu$ m  
319 pore size filter (Sartorius, Darmstadt, Germany) using a Minisart® syringe. The filtrate was  
320 transferred to 2ml tubes and vacuum dried. Then samples were reconstituted in 70 $\mu$ l of  
321 acetonitrile and sonicated for 3 minutes. 2 $\mu$ l of the sample from the HPLC tubes (glass vials)  
322 were injected into the LC-MS/MS system. The MS method used measured positive and  
323 negative ionization mode within one run (polarity switching). Negative ions were detected at  
324 an ion spray voltage of -4500 V (ESI-) using ion source parameters: curtain gas (35 psi),  
325 temperature (550°C), gas 1 (55 psi), gas 2 (65 psi), collision activated dissociation (-3 V),  
326 and entrance potential (-10 V). Positive ions were detected at an ion spray voltage at 4500 V  
327 (ESI+) using ion source parameters: curtain gas (35 psi), temperature (550°C), gas 1 (55 psi),  
328 gas 2 (65 psi), collision activated dissociation (-3 V) and entrance potential (10 V) and 40°C  
329 column oven temperature was at a QTRAP 6500+ mass spectrometer (Sciex, Darmstadt,  
330 Germany). MS/MS fragmentation was obtained and samples were separated by ExionLC  
331 UHPLC (Shimadzu Europa GmbH, Duisburg, Germany) using 100  $\times$  2.1 mm<sup>2</sup>, 100 Å, 1.7  
332  $\mu$ m, Kinetex F5 column (Phenomenex, Aschaffenburg, Germany). Solvent used for  
333 separation were (A) 0.1% formic acid in water (v/v) and (B) 0.1% formic acid in acetonitrile  
334 (v/v) with a flow rate of 0.4 ml/minute. Chromatographic separation was performed with the  
335 gradient of 0% B for 2 minutes, increased in 1 minute to 30% B and in 12 minutes to 30% B,  
336 increased in 0.5 minute to 100% B, held 2 minutes isocratically at 100% B, decreased in 0.5  
337 minute to 0% B, and held 3 minutes at 0% B. Phytohormone quantification was performed  
338 based on comparison with standard curves prepared with purified hormones and using AUC.  
339 The final concentrations were obtained in nanograms of hormone per gram of fresh weight of  
340 the sample.

341

342 **Infection data**

343 Data on *P. infestans* infections were taken from Kahlon *et al.* (2021), using the same methods  
344 that were previously described in Stam *et al.* (2017). In these studies, detached leaves were  
345 drop infected with a *P. infestans* solution (3000 sporangia/ml). All leaflets of the compound *S.*  
346 *chilense* leaves were infected with a single drop and the infection frequency (IF) was  
347 calculated per leaf and summarized per plant an population. The data originate from the exact  
348 same plants as those used in this study.

349

**350 Statistical analysis of the data, Pearson's correlation and linear mixed models for**  
**351 infection frequencies with components of basal immunity and stress-related**  
**352 phytohormones**

353 All the data analyses were performed in the R software (version 3.4.4, R core Team, 2020).  
354 ANOVA was performed with the function `aov()`, and post hoc Tukey tests with the function  
355 `TukeyHSD()`, from the package `{stats}`. When the *p*-value was lower than 0.05 it was  
356 considered significant. Pearson's correlation was performed using the function `cor()`. The  
357 analyses were done for the 83 plants for which IF scores were available (Kahlon *et al.*, 2021).  
358 Figures were made using the R package `{ggplot2}`.

359

**360 Validation of ET accumulation in delivering resistance in individuals from the southern**  
**361 coastal population**

362 ET validation experiments were performed on two individuals (plant 05 and plant 10) from a  
363 southern coast population, LA4107, selected based on Pearson's correlation among ET  
364 production and infection frequency. ET measurement in the leaf discs was performed as  
365 described above. ET blocking was performed by adding 5 $\mu$ M aminoethoxyvinyl glycine  
366 (AVG) (Sigma) to the samples and 3 hours post-treatment ET was measured by gas  
367 chromatography. The infection frequency upon treatment with 5 $\mu$ M AVG was determined  
368 using detached leaf infection assay as described in Kahlon *et al.* (2021): detached leaves were  
369 surface sterilized with 70% ethanol and kept upside down (adaxial side facing upwards) in  
370 plastic boxes containing a wet tissue bed. The leaf set for AVG treatment was kept on a wet  
371 tissue bed made with water containing AVG (5 $\mu$ M) and leaves were sprayed with 5 $\mu$ M AVG  
372 following drop inoculation with *P. infestans* isolate Pi100 (3000 sporangia/ml). The  
373 experiment was repeated on eight individual leaves per treatment. Throughout the  
374 experiment, 18-20°C temperature was maintained and boxes were kept in dark. The infection  
375 outcome was taken at 7 days post-inoculation.

376

## 377 Results

### 378 Laminarin elicits a transcriptional response overlapping with that induced by *P.* 379 *infestans*

380 First, we set out to confirm whether the purified glucan elicitor laminarin can elicit  
381 oomycete-like early defence responses in *S. chilense*. Therefore, we infected *S. chilense*  
382 plants of population LA3111 with *P. infestans* or treated the plants with laminarin and  
383 measured the transcriptional response after 3 hours.

384 As expected, infection with *P. infestans* triggered strong transcriptional responses. In total,  
385 we measured 595 differentially expressed genes (false discovery rate adjusted  $p$ -value $<0.05$ )  
386 upon *P. infestans* infection (371 up-regulated and 224 down-regulated). Laminarin treatment  
387 results in 102 differentially regulated genes (31 up-regulated and 72 down-regulated). (Table  
388 S2). More than 50% of the genes that were differentially expressed after laminarin treatment  
389 were overlapping with the *P. infestans*-associated response. For the upregulated gene  
390 fraction, the overlap was 77%. Only a small number of DEGs (12) can be uniquely detected  
391 in a direct pairwise comparison between the Laminarin-treated and *Phytophthora*-treated  
392 samples, thus the false positive discovery rate in this experiment is likely lower than 2%.  
393 (Figure 1A-C). To validate our hypothesis that laminarin triggers a decomplexified defence  
394 response, we analysed the annotations of the overlapping gene lists. 35% of the overlapping  
395 genes are associated with the Biological process: Stress Response and the overlapping  
396 fraction is significantly more often annotated with the GO terms enzyme regulator activity  
397 and receptor activity (chi-square test,  $p < 0.01$ , Figure 1D-E, Table S3-S4). Moreover,  
398 homologs of more than half of the overlapping genes are reported in the literature to be  
399 involved in defence responses (Table S5). We found homologs of regulators of the plant ROS  
400 response (SOLCI005830700, Peroxidase *CEVII*), key regulators of defence hormone  
401 signalling like *ER5* (SOLCI004643500, ET response); *LOXI* (SOLCI003764800, JA  
402 signalling) or *PAL3* (SOLCI000597200, SA signalling) and upregulation of *Mitogen-*  
403 *activated protein kinases* (*MAPKs*, SOLCI002491100). This supported that laminarin can  
404 trigger a subset of oomycete-associated defence responses and is a suitable compound to  
405 study variation in basal defence responses in *S. chilense*.

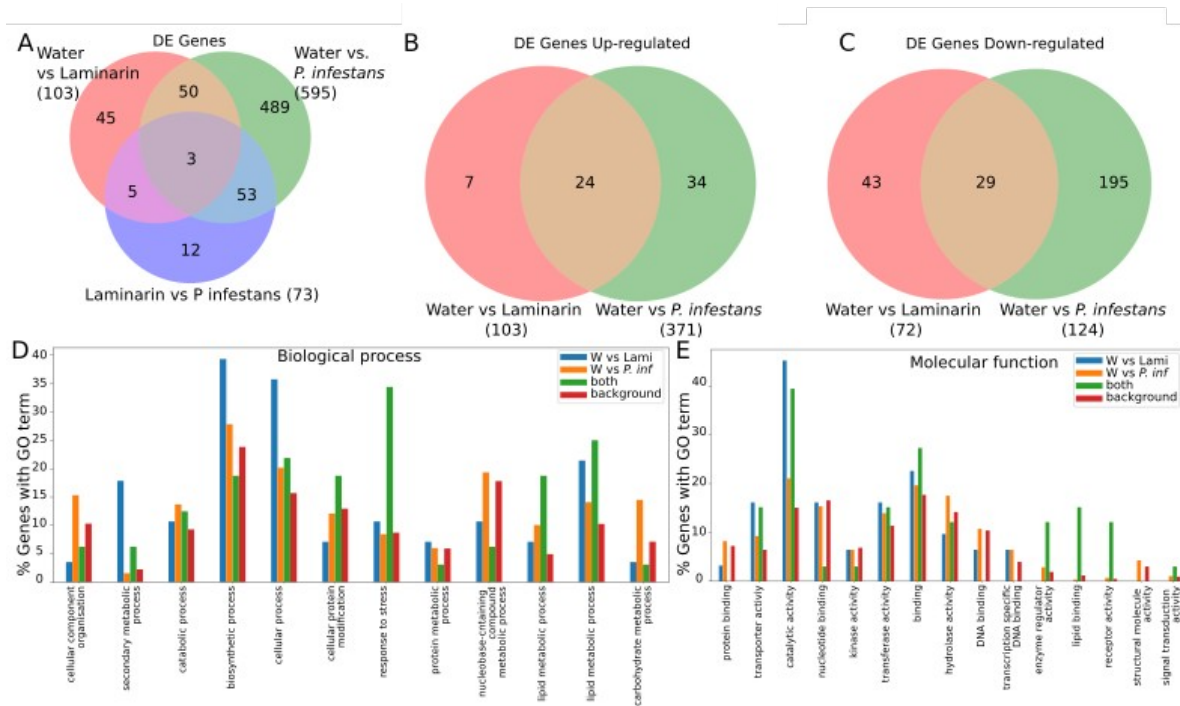

407 Figure 1: RNAseq analysis of the central population LA3111 (nine plants pooled per treatment) of *S.*  
 408 *chilense* 3 hours after *P. infestans* (3000 sporangia/ml), laminarin (1mg/ml) and water treatment.  
 409 Differentially expressed genes (DEGs) overlap in different treatment: overall (a), up-regulated (b) and  
 410 down-regulated (c), Gene Ontology (GO) analysis of RNA-seq data showing % genes with signals for  
 411 gene ontology terms for biological and molecular function for laminarin Vs *P. infestans* treatment  
 412 (d,e).

413

414 To independently verify the involvement of laminarin-specific phytohormone-associated  
 415 defence responses, we evaluated the expression of key regulators described in literature of  
 416 three phytohormones, ET, SA and JA in an *S. chilense* individual from a different central  
 417 population: LA1963 (plant 02). We observed an up to 7.8-fold increase in expression of *S.*  
 418 *chilense ACS2* (SOLCI000989600), a key regular in the ET pathway in laminarin treated  
 419 samples as compared to water-treated samples (Figure S1). Next, we looked into key  
 420 regulators from the two known pathways for SA regulation. We observed that *PAL*-like  
 421 transcripts (SOLCI002546900) showed up to 14-fold increase in laminarin-treated samples as  
 422 compared to water-treated controls. *ICS* (SOLCI004470400), the key regulator of the second  
 423 SA pathway was downregulated (Figure S1). For the JA pathway, we performed qPCR on the  
 424 *LOXD* (SOLCI003768300) gene and observed an up to 10-fold increase in the laminarin  
 425 treated samples (Figure S1). Thus, we confirmed differential regulation of key regulators in  
 426 defence-associated phytohormone pathways.

427

## 428 ROS production in *S. chilense* is highly polymorphic

429 ROS is one of the important key regulators in basal immune responses, and regulators of the  
430 ROS pathway were differentially expressed in the RNAseq data (Table S5). Thus, we tested  
431 ROS production in 83 genetically distinct *S. chilense* plants upon elicitation with laminarin.  
432 Maximum ROS production upon laminarin elicitation was significantly different between the  
433 populations (Figure 2A, Table S6). The highest average ROS maximum was recorded in  
434 LA3111 and the lowest average in LA3786.

435 When grouping the populations in geographical region and looking at the overall average in  
436 ROS maxima the southern highlands group had the highest ROS production and the northern  
437 group had the lowest (Figure S2). We also found significant differences in ROS maxima in  
438 within the individual populations for 8 out of 9 populations (Table S7), with some plants  
439 showing high ROS production and others showing no detectable ROS production upon  
440 elicitation with laminarin (Figure 2B and Figure S3).

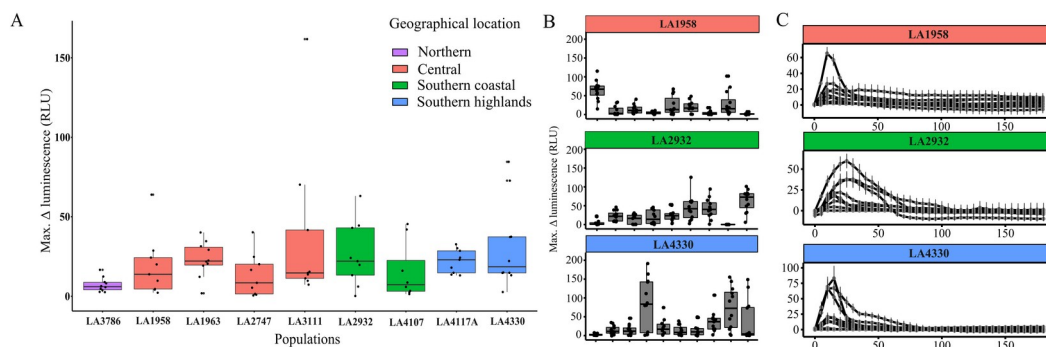

441

442 Figure 2: ROS accumulation in the leaf discs from *Solanum chilense* measured from 0-180 minutes  
443 upon elicitation with laminarin (1mg/ml). A) Overview for each of the populations. Each boxplot  
444 represents a populations, each black dit the mean measured value for one plant, obtained from three or  
445 four individual repetitions, as explained in B, All the significance data is highlighted in supplemental  
446 material. B) examples highlighting the within-population diversity for for three of nine populations.  
447 Each box plot represents an individual plant per population with data from one leaf disc represented  
448 as one data point accounting up to ten to twelve leaf discs per plant. Individual measurements were  
449 performed on three different dates (n=3-4 each date; 3x3(4)=10(12) leaf discs per plant), each median  
450 of the boxplot B represnt single datapoints of A in corresponding population plant datapoints. C.  
451 Differences in ROS kinetics for the three highlighted populations from panel B. X-axis are minutes  
452 post treatment. Y-axis shows relative luminescence unit (RLU). Colors of the boxplots or header bars  
453 represent the geographical location of the population. Extended panels like B and C for all  
454 populations can be found in Figure S3 and S4 . Each data point is a median similar to panel B and  
455 the error bar represnet standard error to have a clear visulatization of the different plants.

456 We also observed variation in the kinetics of the ROS production, with plants in some  
457 populations not showing a clear single peak, but rather a longer-lasting ROS production. This  
458 phenomenon appeared more common in the southern populations and occurs most frequently  
459 in southern populations (Figure 2C and S4).

460 To confirm the specificity of the observed ROS production towards laminarin, and to show  
461 that lack of observed ROS burst does not result from a general ROS signalling impairment in  
462 the plants, we further tested ROS production after elicitation with the bacterial PAMP peptide  
463 flg22 in all plants from population LA4330 (Figure S5). This revealed variable ROS  
464 production upon elicitation with flg22. Moreover, there appears to be no apparent correlation  
465 between the strengths of flg22- and laminarin-triggered responses. Some plants showed no  
466 flg22 response and a clear laminarin response, or vice versa and some plants showed  
467 responses in similar intensity. This suggests that the observed differences in some plants are  
468 elicitor-specific variation and not a general effect of ROS production ability or defence  
469 signalling pathways.

470

### 471 **ET accumulation upon laminarin treatment is low in southern highland populations**

472 To evaluate the role of phytohormones in the resistance differences observed in *S. chilense*,  
473 we first looked into ET production. Upon elicitation with laminarin, we observed that plants  
474 showed significant differences in ET production as compared to mock-treated samples  
475 (Figure 3, Table S8 and S9). Out of 83 plants tested, we found significantly induced ET  
476 production upon elicitation in 39 plants. Plant 02 from LA1963 showed a clear ET response  
477 and so do several plants from population LA3111, confirming our RNAseq and gene  
478 expression qPCR results above (Figure S1 and Table S9). Hence, differential ET-pathway  
479 gene expression in these plants leads to laminarin-elicited ET accumulation.

480

481

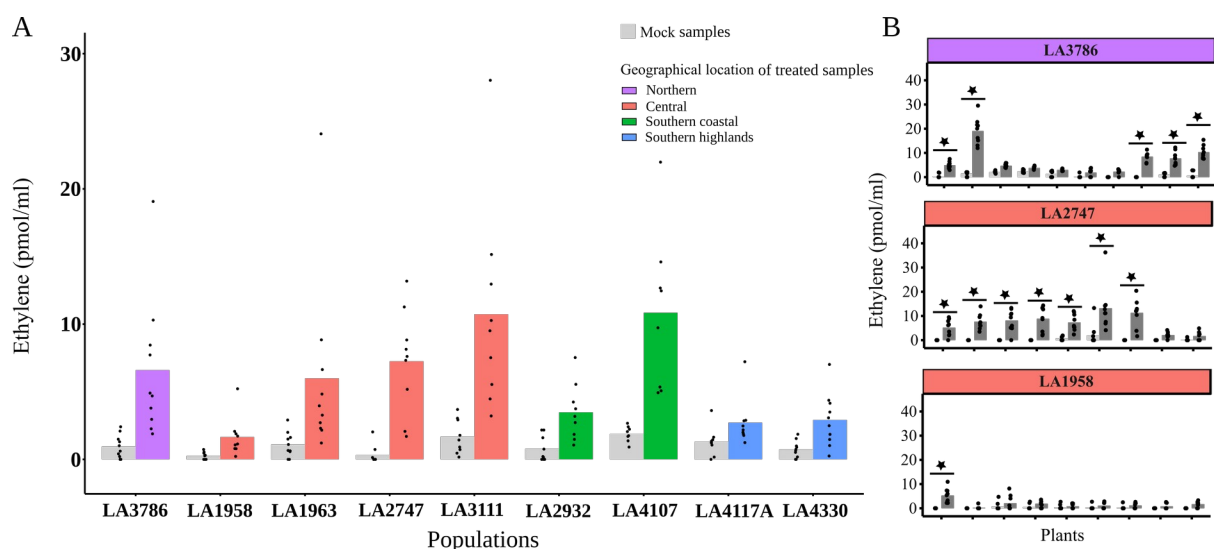

482 Figure 3: ET accumulation in the leaf discs from *S. chilense* 3 hours upon elicitation with laminarin  
483 (1mg/ml) and mock (milliQ H<sub>2</sub>O). A) Each bar pair, (light grey and colored) represents an population.  
484 Each bar shows the mean of the population each dot represents the mean of one plant from three



485 individual repetitions (as in B), All the significance data is highlighted in supplemental material. B)  
486 Each bar pair (light grey and dark grey) represents an individual from the population. Each bar shows  
487 mean of 7-9 data points which represent 7-9 samples measurements performed on three different dates  
488 ( $n=2-3$  samples each date), each sample contained three leaf discs. Significantly different ET  
489 accumulation in laminarin treated samples from the mock treated samples in an individual is  
490 represented with the star on the bar pair (ANOVA with post hoc Tukey tests on complete dataset). Y-  
491 axis shows ET accumulation in pmol/ml headspace of the samples. Each panel in B shows different  
492 population and colors represent the geographical location of the population. Panels for all additional  
493 populations can be found in Figure S6A.

494

495 We find significant differences in ET accumulation between the populations (Figure 3A,  
496 Table S10). Looking at the populations based on their geographical locations shows that  
497 overall average of ET accumulation was lowest in the southern highlands group (Figure  
498 S2B). Within populations, we observed that the number of plants that significantly differ in  
499 ET response varied dependent on the population. Population LA3786 showed the most  
500 differences between individual plants and LA2747 was the most uniform, population LA1958  
501 showed nearly no ET response (Figure 3B, Table S11).

502

### 503 **Populations show high diversity in the basal level of phytohormones**

504 Next, we looked into the production of two important defence-related phytohormones and  
505 their derivatives, for which we detected expression of key regulators in our RNAseq data, JA  
506 and SA, as well as other phytohormones and their derivatives that are known to be involved  
507 in stress responses: ABA, PA, DPA and IAA.

508 With our method, we were unable to detect quantifiable amounts of JA in any of the samples  
509 tested, but were able to quantify both free and total SA in the basal state and after elicitation.  
510 We observed that most populations did not show strong differences in the levels of SA (free  
511 and total) after elicitation with laminarin (Figure 4A and B, Figure S6 B and C and Table S8).  
512 Four plants form an exception: two showed a higher amount of free SA (LA3111 plant 05  
513 and LA4330 plant 05), and two showed a lower amount of free SA (LA2932 plant 12 and  
514 LA4107 plant 12) when compared to the mock-treated samples (Figure S6B). These  
515 differences did not correspond with those plants being more resistant or susceptible than  
516 other plants in the corresponding populations.

517 Interestingly, we measured significant differences in basal levels of free and total SA within  
518 and between populations. The correlation coefficient between free and total SA content is  
519 0.46 ( $p$ -value=1.10E-05) (Table S12), therefore we treated free and total SA independently in  
520 further analyses. Both basal SA levels (free and total) were significantly different between the

521 populations (Table S13). As with ROS and ET responses, we also found significant  
 522 differences within the populations for basal levels of both free SA and total SA content  
 523 (Table S14).

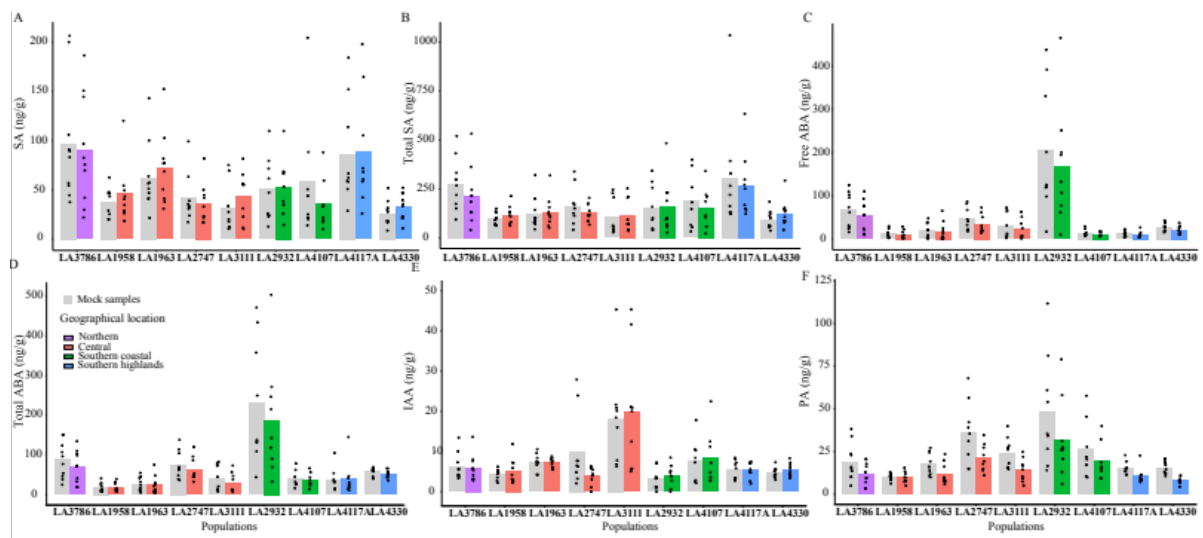

525 Figure 4: Phytohormone measures in the leaf discs from *S. chilense* 3 hours upon elicitation with  
 526 laminarin (1mg/ml) and mock (milliQ H<sub>2</sub>O). Each bar pair (light grey and colored) represents a  
 527 population. Each dot represents the mean of a single individual measured with at least three  
 528 independent repetitions. Results for each individual plant can be found in Figure S6. Y-axis shows  
 529 phytohormone accumulation in ng/g of the samples. Colors represent the geographical location of the  
 530 population.

531

532 We also measured ABA, PA, DPA and IAA, which are described to be important for biotic  
 533 stress responses and pathways of several of these hormones influence each other. We did not  
 534 detect DPA in our samples. We detected basal levels for the phytohormones ABA (free ABA,  
 535 Figure 4C, Figure S6D and total ABA, Figure 4D, Figure S6E), IAA (Figure 4E, Figure S6F)  
 536 and PA (Figure 4F, Figure S6G). Laminarin treatment did not significantly change the level  
 537 of these phytohormones except for PA (Table S8). For PA we observed a significantly lower  
 538 amount after treatments when compared to the basal level in plants (Figure 4F, Figure S6G  
 539 and Table S15). Although, in general basal levels of PA and PA levels upon elicitation were  
 540 highly correlated (Pearson's correlation coefficient of 0.74,  $p$ -value=2.2E-016) (Table S12).  
 541 We observed a higher amount of basal levels of free and total ABA in LA2932 as compared  
 542 to other populations, whereas IAA was higher in LA3111. The levels of all these  
 543 phytohormones show significant differences between and within populations (Table S16 and  
 544 Table S17, respectively) in an independent manner (Table S12). Looking at the data of all the  
 545 tested populations based on geographic location, we found higher levels of basal PA in the

546 southern coast and IAA was higher in the central region whereas SA (free and total) was high  
547 in the north and ABA levels were higher in northern and south coast populations (Figure S2)..  
548

#### 549 **Multiple defence responses correlate with observed resistance phenotypes**

550 To assess whether the individual defence responses measured in the plants can be associated  
551 with *S. chilense* resistance properties, we looked for correlations with previously generated  
552 data on the frequency with which *P. infestans* can infect *S. chilense* leaflets, the so-called  
553 infection frequency (IF) (Kahlon *et al.*, 2021). We found no correlation between the observed  
554 ROS maxima and the IF observed with *P. infestans* (Pearson's correlation coefficient of 0.09,  
555  $p$ -value=0.37, Table 1), whereas we found a significant negative Pearson's correlation of IF  
556 with ET accumulation (-0.36,  $p$ -value=0.0008; Table 1). The Pearson's correlation of IF with  
557 basal levels of PA also showed a negative correlation (-0.2443413,  $p$ -value=0.026; Table 1),  
558 whereas we observed no strong or significant ( $p$ -value<0.05) correlation for SA , ABA and  
559 IAA (Table 1).

560

561

562

563 Table 1: Pearson's correlation of measured potential immunity-related factors at basal levels and upon  
564 elicitation with laminarin (1mg/ml) with the infection frequency (IF) of same plants upon inoculation  
565 with *P. infestans* Pi100 published in Kahlon *et al.* (2021). The correlation is shown for the all the  
566 measured components. Significant correlation is highlighted in green.

567

| Parameter compared   | Pearson's correlation coefficient | <i>p</i> -value |
|----------------------|-----------------------------------|-----------------|
| IF~ROS               | 0.10                              | 0.3748          |
| IF~ET                | -0.36                             | 0.0008          |
| IF~Free SA (Basal)   | -0.05                             | 0.6290          |
| IF~Total SA (Basal)  | -0.15                             | 0.0690          |
| IF~Free IAA (Basal)  | -0.13                             | 0.2727          |
| IF~Free ABA (Basal)  | -0.12                             | 0.2737          |
| IF~Total ABA (Basal) | -0.12                             | 0.2419          |
| IF~PA (Basal)        | -0.24                             | 0.0260          |

568

569

570

### 571 **The dominance of individual defence responses differs geographically**

572 All measured components showed geographical trends at basal and induced levels (Figure S2,  
573 as well as S3, S4, S6). This supports that the plants' genotypes rather than the common  
574 experimental environment was the driver of metabolic differences between the plants. We  
575 hypothesize that different populations have adapted different defence strategies due to  
576 adaptation to specific climatic niches. Thus, to confirm the possible larger effect any of  
577 measured components in certain geographical regions, we calculated the correlation  
578 coefficient for ET and PA for each of the geographical groups of *S. chilense*. We found that  
579 the effect of ET is most strongly correlated with resistance in the coastal populations,  
580 whereas PA showed the strongest correlation to resistance in the central group (Figure 5 and  
581 Table S18).

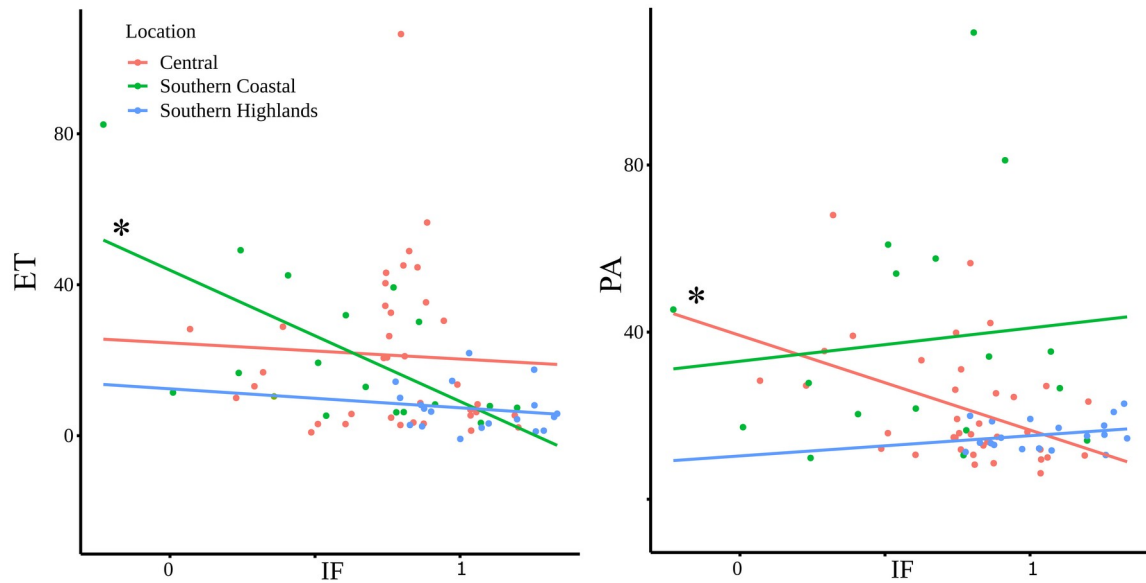

582

583 Figure 5: Correlations between the *P. infestans* infection frequency (IF, X-axis) and the measured ET  
584 or PA response phytohormone accumulation in ng/g of the samples or pol/ml respectively (Y-axis).  
585 Each dot represents the mean value of an individual plant from three individual repetitions. Infection  
586 frequencies were obtained from an independent experiment from the same plants as presented in  
587 Kahlon et al (2020). IF at zero indicates plants that are fully resistant and IF at one shows 100%  
588 infection rate upon inoculation. The Pearson correlations were calculated per geographic group. The \*  
589 indicates the significant correlations for the central and southern coastal populations for PA and ET  
590 respectively.

591

### 592 ET plays a role in defence response in southern coast tested individuals

593 To confirm the contribution of ET to resistance in the coastal populations, we selected two  
594 plants from southern coastal population LA4107, one with relatively high ET production and  
595 another with relatively moderate ET production, with low and medium-high scores from the  
596 infection frequency spectrum, respectively. To verify the role of ET on the resistance  
597 outcome, we used AVG, a well-established chemical inhibitor, to halt the ET production in  
598 the selected plants and tested the ET accumulation after laminarin treatment. AVG was  
599 successfully able to inhibit the ET production up to 100% in the plant samples (Figure 6A).  
600 After inoculation with *P. infestans* isolate Pi100, the plants indeed showed higher  
601 susceptibility when they were pre-treated with AVG as compared to control plants,  
602 confirming the positive role of ET in basal resistance in this population (Figure 6B).

603

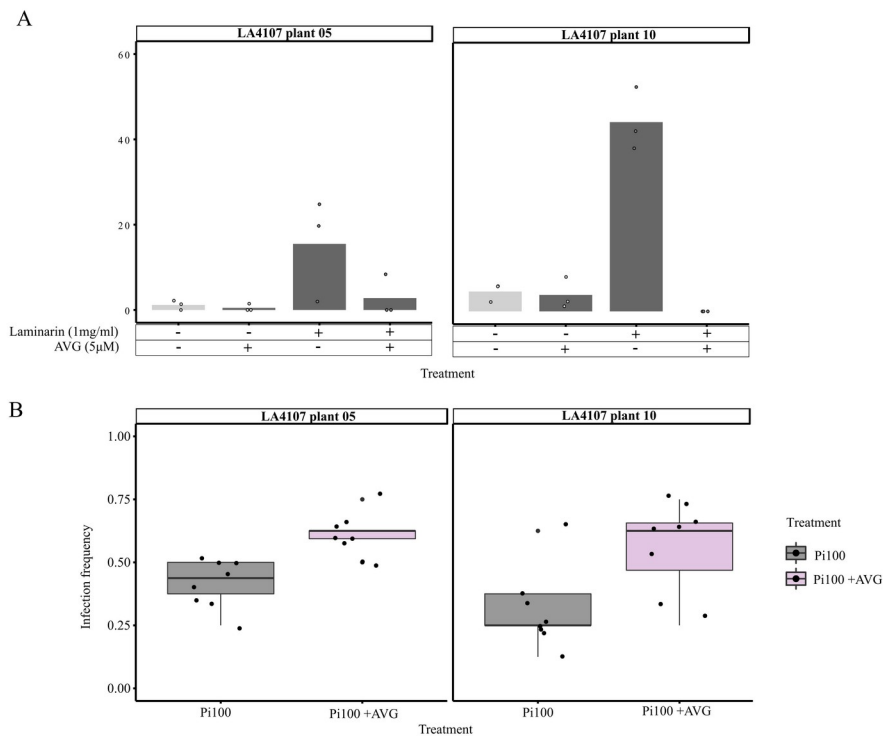

604

605 Figure 6: ET inhibition assay on LA4107 plant 05 and plant 10: ET accumulation in the the leaf discs  
606 from *S. chilense* LA4107 plant 05 and 10, 3 hours upon elicitation with laminarin (1mg/ml), AVG  
607 (5µM), laminarin (1mg/ml) + AVG (5µM), and mock (milliQ H<sub>2</sub>O). Light and dark grey crossbar pair  
608 represents plant with and without treatment with laminarin (1mg/ml). Each crossbar is the mean of  
609 three samples measurement. Y-axis shows ET accumulation in pmol/ml air of the samples. b)  
610 Detached leaf infection assay of LA4107 plant 05 and 10 upon drop inoculation with *Phytophthora*  
611 *infestans* Pi100 (3000 sporangia/ml) with and without AVG (5µM) treatment. Y-axis represents  
612 infection frequency which is the ratio of infected leaflets divided by inoculated leaflets. Each dot  
613 represents the ratio from one leaf, the red dot represents the mean value and the *p*-value is shown on  
614 the top of the boxplot.

615

## 616 Discussion

617 We previously used natural populations of *S. chilense* to show intraspecific variation in  
618 resistance against *P. infestans* (Kahlon *et al.*, 2021). In this study, we evaluated several key  
619 components of basal defence responses in the same plants to explore molecular cues behind  
620 the previously observed phenotypic variation.

621 In order to reliably and reproducibly study defence components in this polymorphic plant  
622 species, and to rule out variation arising during the preparation of pathogen biological  
623 material, we used the glucan elicitor laminarin. Laminarin has been previously reported to  
624 activate basal immune responses such as ROS production, calcium influx and MAPK  
625 activation in members of the Solanaceae family (Meénard *et al.*, 2004; Wanke *et al.*, 2020).

626 We observed significant overlaps in DEGs in *S. chilense* central population LA3111 upon  
627 elicitation with laminarin and infection with *P. infestans*. The majority of these genes are  
628 known for involvement in defence responses. We further showed differences in transcript  
629 levels via qPCR of key regulators of defence-related phytohormones after laminarin  
630 treatment in a plant of a different central population, LA1963. This suggests that laminarin  
631 can be used as a proxy for evaluating early basal immune responses activation in *S. chilense*.  
632 The RNAseq data of both *P. infestans* and laminarin treatments revealed regulation of  
633 homologs of several previously identified genes known in major defence pathways, like ROS  
634 production and both SA and JA signalling. These basal immunity components have been  
635 shown to be involved in *P. infestans* resistance in different Solanaceous plant species. In  
636 cultivated tomato, reduced accumulation of ROS results in enhanced resistance against *P.*  
637 *infestans* (Cui *et al.*, 2016). Higher SA levels have a positive effect on *P. infestans* resistance  
638 in *S. tuberosum* (Halim *et al.*, 2007). Both, SA and ET contribute to resistance in *N.*  
639 *benthamiana* (Shibata *et al.*, 2010), and higher levels of JA and interplay with SA were  
640 observed in resistant cultivars of *Capsicum annuum* (Ueeda *et al.*, 2005). We observed high  
641 intraspecific diversity in the above-mentioned components early after elicitation with  
642 laminarin, and at basal levels. Large-scale intraspecific variation in basal immunity has also  
643 been reported on a transcriptional level in *A. thaliana* accessions, upon elicitation with the  
644 bacterial PAMP flg22 (Winkelmüller *et al.*, 2021).  
645 Surprisingly, we did not find a strong correlation between the amount of ROS produced in a  
646 plant after elicitation with laminarin and its resistance properties. ROS production upon biotic  
647 stress has often been considered as a hallmark of successful recognition of pathogens and the  
648 activation of defence (Torres, 2010). ROS production linked to the perception of flg22 is  
649 often taken as an indicator for resistance against bacterial *Pseudomonas* spp. pathogens (e.g.  
650 in *A. thaliana*; Smith and Hesse, 2014 and in tomato; Roberts *et al.*, 2019). Our study shows  
651 that laminarin-triggered ROS production in *S. chilense* cannot be used to estimate the basal  
652 resistance against *P. infestans*. Similarly, we also found no correlation between laminarin-  
653 triggered SA production or basal SA levels and *P. infestans* resistance. Thus, these individual  
654 defence components triggered by laminarin either have a rather limited contribution to the  
655 observed *P. infestans* resistance in the populations, or ROS and SA are not directly involved  
656 in *P. infestans* resistance in *S. chilense*. On the other hand, laminarin has been shown to  
657 induce the ET pathway, but only sulphated laminarin ( $\beta$ -1,3 glucan sulfate) can induce the  
658 salicylic acid signaling pathway in *N. tabacum* and *A. thaliana* (Meénard *et al.* 2004). In our  
659 RNAseq analysis, we do see more DEGs when plants are treated with *P. infestans* as

660 compared to laminarin. In the future, it would be interesting to evaluate the effects of  
661 sulphated laminarin and other known PAMPs from *P. infestans* in order to dissect the defence  
662 responses further.

663 Our data does support that resistance observed in our plant species can be correlated to  
664 different components in the plants: induced ET and also basal levels of the phytohormone  
665 PA. This is in line with the hypothesis that basal defence is regulated by a complex network  
666 of interacting components from plants and pathogens (Windram and Denbi 2015 , Kahlon  
667 and Stam, 2021a). We also observed that the strength of the correlation is dependent on the  
668 geographical region from which the plants originated. Calculations per population would be  
669 even more interesting, but due to the limited number of plants per population, these  
670 calculations would lack statistical power.

671 It can be assumed that in each populations multiple components play important roles, but that  
672 due to sample size limitations, these effects were not picked up. The generation of  
673 generalized linear mixed models, testing the combined effect of multiple components would  
674 be desirable in this context, though this would require a lot of additional data.

675 It has previously been shown that ROS production leads to SA production in a feed-forward  
676 loop in defence responses in *Arabidopsis* (reviewed by Herrera-Vásquez *et al.*, 2015). We did  
677 not observe such correlation among ROS production and SA production at early time points,  
678 nor did we observe a correlation between SA and ET production as observed in tomato  
679 resistance against the fungal pathogen *Fusarium oxysporum* (Di *et al.*, 2017) . Interestingly,  
680 the suppression of ABA biosynthesis and activation of ET biosynthesis upon copper ions  
681 treatment enhances resistance against *P. infestans* in potato seedlings (Liu *et al.*, 2020b),  
682 whereas in our system ET positively contributed to resistance observed against *P. infestans*.

683 In our assays, ET had the strongest role in early defence. ET has previously been described in  
684 association with various defence responses. In *A. thaliana*, Resistance to Powdery Mildew 8  
685 (RPW8)-mediated defence response is regulated by a ET-mediated feedback loop (Zhao *et*  
686 *al.*, 2021). For Solanaceous species, the activation of defence-related genes in *P. infestans*  
687 resistant potato cultivars upon exogenous ET treatment has also been reported in a recent  
688 transcriptome study, by Yang *et al.*, (2020) and laminarin triggers the expression of ET-  
689 dependent defence genes in *N. tabacum* (Meénard *et al.*, 2004). A positive role of ET  
690 production has been reported in relation to resistance to *C. fulvum* in tomato plants carrying  
691 corresponding resistance genes against a specific *C. fulvum* race (Hammond-Kosack *et al.*,  
692 1996). Another study showed that ET is also involved in resistance to the fungal pathogen *B.*



693 *cinerea* and certain wound responses in tomatoes, with no clear role of JA or SA observed  
694 (Díaz *et al.*, 2002).

695 We further showed geographical variation in basal and induced levels of each component and  
696 expect that the role of each component might differ between populations due to variation in  
697 habitats. Interestingly, the role of ET was stronger in the coastal populations and  
698 experimentally verified with ET inhibition assays in plants from coastal population LA4107.  
699 The stronger association of ET and resistance specifically in the southern coastal populations  
700 could be a result of specific adaptation processes in these populations. This could potentially  
701 reflect an added benefit of the development of stronger ET signalling in these populations as  
702 a result of specific habitat adaptation e.g. to deal with potential abiotic stresses, like salt or  
703 temperature. General temperature dependency of defence regulation and the involvement of  
704 phytohormone signalling has been shown for both cold (Wang *et al.*, 2019) and heat stress  
705 (Huang *et al.*, 2021). ET has been shown to be a crucial phytohormone when it comes to  
706 coping with salinity stress in plants (Riyazuddin *et al.*, 2020). The positive effects of ET in  
707 salt tolerance have been illustrated in *A. thaliana* (Yang *et al.*, 2013) and *Zea mays* (Freitas *et*  
708 *al.*, 2018). In a study by Kashyap *et al.*, (2020), *S. chilense* plants under salt stress coped  
709 better than cultivated *S. lycopersicum* due to a better anti-oxidant system. We also observed  
710 high basal levels of the phytohormone ABA in the coastal population LA2932 (Figure 4C-D).  
711 ABA is highlighted to be an important phytohormone for abiotic stress tolerance including  
712 salinity stress (reviewed by Zhu, 2002 and Ng *et al.*, 2014).

713 The genotype-to-phenotype linkages in systems biology are complex. In a diverse panel of  
714 wild and domesticated tomatoes basal resistance against the generalist fungal pathogen  
715 *Botrytis cinerea* has been reported to be dependent on the interaction of multiple loci among  
716 both host and pathogen (Soltis *et al.*, 2019). Here we presented a decomplexification  
717 approach, where more components can be added to understand both the triggers (by testing  
718 different elicitors) and the outcomes (by measuring more responses). As highlighted by  
719 Marshall-Colón and Kliebenstein, (2019), such future studies should be performed using  
720 large-scale metabolomics and transcriptomics analyses, to determine the key regulators  
721 underlying the measured responses and to be able to appreciate the intrinsic value of the  
722 complexity of signalling networks.

723 In our previous studies (Stam *et al.*, 2017; Kahlon *et al.*, 2021) we showed no strong signs of  
724 host adaptation towards resistance to *P. infestans*, as resistance shows no clear geographical  
725 pattern of adaptation. However, our current results indicate that different coping mechanisms  
726 are present in each of these populations, possibly due to specific adaptation to the niches that

727 the plants inhabit in each region. Examples of such specific adaptations have also been  
728 observed for other host-parasite interactions. Populations of *Eruca vesicaria* (syns. *Eruca*  
729 *sativa*, wild rocket) from Mediterranean and desert habitats showed activation in defence  
730 responses via two different mechanisms when challenged with generalist herbivore  
731 *Spodoptera littoralis*. Mediterranean plants showed accumulation of glucosinolates and desert  
732 plants showed induced levels of a specific protease inhibitor (Ogran *et al.*, 2016). Beevan *et*  
733 *al.* (1993) showed immense differences in phenotypes of two populations of *Senecio vulgaris*  
734 (groundsel) against *Erysiphe fischeri* and proposed different populations have evolved  
735 different survival strategies against the same pathogen. In *A thaliana*, combined effects of  
736 genetic variation and differences in environmental factors also shape defence-associated  
737 metabolite contents (Katz *et al.* 2021)

738 Together our data support high complexity of *S. chilense*'s defence response to the general  
739 glucan elicitor laminarin. These responses might contribute to *P. infestans* resistance by  
740 additive or network functions. At single geographic location, certain plant hormones play a  
741 bigger role than at others. We hypothesize, that wild plants adapt to the local abiotic  
742 environment and hormones may be key to this adaptation. The corresponding defence  
743 machinery might simultaneously undergo co-adaptation to cope with biotic stress. We  
744 speculate that plants' high connectivity between abiotic and biotic signaling results in the  
745 necessity to habitat-specifically recruit different defence pathways and that the nature of the  
746 involved hormones accordingly differs in the wild. This would be determined not only by the  
747 local pathogens but also strongly by the abiotic environment and highlights the need for  
748 further population-scale studies on pathogen resistance mechanisms (Kahlon and Stam 2021).

749

750

751

## 752 **Acknowledgments**

753 We would like to thank Dr. Stefanie Ranf (TUM, Chair of Phytopathology), Dr. Christina  
754 Steidle (TUM, Chair of Phytopathology) and Dr. Harald Schempp (TUM, Chair of  
755 Phytopathology) for their help with setting up of ROS production assay and ET  
756 measurements assay for the wild tomato. Ethan Weiner (visiting RISE-DAAD scholar, TUM,  
757 Chair of Phytopathology) for assistance in the initial set-up of the SA and JA measurements  
758 in wild tomato, Lina Muñoz (TUM, Chair of Phytopathology) for helping with the sample  
759 preparation for phytohormones extraction, Dr. Christine Wurmser (TUM, NGS@TUM) for  
760 running the sequencing for our RNAseq experiments, Prof. Aurélien Tellier (TUM, Section  
761 of Population Genetics) for sharing the *S. chilense* populations and Sabine Zuber, Bärbel  
762 Breulmann and Anneliese Keil for maintaining them at the TUM's plant technology center.

763

## 764 **Author contributions**

765 Conceptualization: RS, PSK, CD, RHü and JB; Investigation: PSK, AF, MM, MO, MG and  
766 RHa; Data interpretation and evaluation: PSK, MM, AF, MO, RHü and RS; Writing and Data  
767 representation: PSK and RS. All authors reviewed and approved the manuscript.

768

## 769 **Conflicts of interests**

770 The authors declare that no competing interests exist.

771

## 772 **Funding information**

773 This work was supported by a research grant to RS in frame of the collaborative research  
774 center SFB924 supported by the German Research Foundation (DFG).

775

## 776 **Data Statement**

777 Analytical results are included in the supplementary data files. Raw sequence data (Illumina  
778 reads) are uploaded to NCBI SRA and available under PRJNA746795. All scripts used for  
779 the analyses, as well as all intermediate data files (e.g. FeatureCount output files) can be  
780 found on Zenodo (10.5281/zenodo.5101308)

781

782

## 783 References:

784

- 785 **Ahmad S, Van Hulten M, Martin J, Pieterse CMJ, Van Wees SCM, Ton J.** 2011.  
786 Genetic dissection of basal defence responsiveness in accessions of *Arabidopsis thaliana*.  
787 *Plant, Cell & Environment* **34**, 1191–1206.
- 788 **Audenaert K, De Meyer GB, Höfte MM.** 2002. Abscisic acid determines basal  
789 susceptibility of tomato to *Botrytis cinerea* and suppresses salicylic acid-dependent signaling  
790 mechanisms. *Plant Physiology* **128**, 491–501.
- 791 **Aronson JM, Cooper BA, Fuller MS.** 1967. Glucans of Oomycete Cell Walls. *Science* **155**,  
792 332–335.
- 793 **Aziz A, Poinssot B, Daire X, Adrian M, Bézier A, Lambert B, Joubert J-M, Pugin A.**  
794 2003. Laminarin elicits defense responses in grapevine and induces protection against  
795 *Botrytis cinerea* and *Plasmopara viticola*. *Molecular Plant-Microbe Interactions* **16**, 1118–  
796 1128.
- 797 **Barragan AC, Weigel D.** 2021 Plant NLR diversity: the known unknowns of pan-NLRomes.  
798 *The Plant Cell* **33**, 814–831.
- 799 **Bates D, Mächler M, Bolker B, Walker S.** 2015. Fitting Linear Mixed-Effects Models  
800 Using lme4. *Journal of Statistical Software* **67**, 1–48.
- 801 **Bevan JR, Clarke DD, Crute IR.** 1993. Resistance to *Erysiphe fischeri* in two populations  
802 of *Senecio vulgaris*. *Plant Pathology* **42**, 636–646.
- 803
- 804 **Bolger AM, Lohse M, Usadel B.** 2014. Trimmomatic: a flexible trimmer for Illumina  
805 sequence data. *Bioinformatics* **30**, 2114–2120.
- 806 **Böndel KB, Lainer H, Nosenko T, Mboup M, Tellier A, Stephan W.** 2015. North–South  
807 Colonization Associated with Local Adaptation of the Wild Tomato Species *Solanum*  
808 *chilense*. *Molecular Biology and Evolution* **32**, 2932–2943.
- 809
- 810 **Chaudhary A, Chen X, Gao J, Leśniewska B, Hammerl R, Dawid C, Schneitz K.** 2020.  
811 The *Arabidopsis* receptor kinase STRUBBELIG regulates the response to cellulose  
812 deficiency. *PLOS Genetics* **16**, e1008433.
- 813 **Coleman AD, Maroschek J, Raasch L, Takken FLW, Ranf S, Hückelhoven R.** 2021. The  
814 *Arabidopsis* leucine-rich repeat receptor-like kinase MIK2 is a crucial component of early  
815 immune responses to a fungal-derived elicitor. *New Phytologist* **229**, 3453–3466.
- 816
- 817 **Cui J, Jiang N, Meng J, Yang G, Liu W, Zhou X, Ma N, Hou X, Luan, Y.** 2016.  
818 LncRNA33732-respiratory burst oxidase module associated with WRKY1 in tomato-

- 819 *Phytophthora infestans* interactions. Plant Journal **97**, 933–946.
- 820 **Di X, Gomila J, Takken FLW**. 2017. Involvement of salicylic acid, ethylene and jasmonic  
821 acid signalling pathways in the susceptibility of tomato to *Fusarium oxysporum*. Molecular  
822 Plant Pathology **18**, 1024–1035.
- 823 **Díaz J, Have A ten, Kan JAL van**. 2002. The role of ethylene and wound signaling in  
824 resistance of tomato to *Botrytis cinerea*. Plant Physiology **129**, 1341–1351.
- 825
- 826 **Fischer I, Steige KA, Stephan W, Mboup M**. 2013. Sequence evolution and expression  
827 regulation of stress-responsive genes in natural populations of wild tomato. PLOS ONE **8**,  
828 e78182.
- 829 **Freitas VS, Miranda R de S, Costa JH, Oliveira DF de, Paula S de O, Miguel E de C,**  
830 **Freire RS, Prisco JT, Gomes-Filho E**. 2018. Ethylene triggers salt tolerance in maize  
831 genotypes by modulating polyamine catabolism enzymes associated with H<sub>2</sub>O<sub>2</sub> production.  
832 Environmental and Experimental Botany **145**, 75–86.
- 833 **Gravino M, Savatin DV, Macone A, De Lorenzo G**. 2015. Ethylene production in *Botrytis*  
834 *cinerea*- and oligogalacturonide-induced immunity requires calcium-dependent protein  
835 kinases. Plant Journal **84**, 1073–1086.
- 836 **Halim VA, Eschen-Lippold L, Altmann S, Birschwilks M, Scheel D, Rosahl S**. 2007.  
837 Salicylic acid is important for basal defense of *Solanum tuberosum* against *Phytophthora*  
838 *infestans*. Molecular Plant-Microbe Interactions **20**, 1346–1352.
- 839 **Hammond-Kosack KE, Silverman P, Raskin I, and Jones JDG**. 1996. Race-specific  
840 elicitors of *Cladosporium fulvum* induce changes in cell morphology and the synthesis of  
841 ethylene and salicylic acid in tomato plants carrying the corresponding *Cf* disease resistance  
842 gene. Plant Physiology **110**, 1381–1394.
- 843
- 844 **Heitz T, Bergey DR, Ryan CA**. 1997. A gene encoding a chloroplast-targeted lipoxygenase  
845 in tomato leaves is transiently induced by wounding, systemin, and methyl jasmonate. Plant  
846 Physiology **114**, 1085–1093.
- 847 **Herrera-Vásquez A, Salinas P, Holuigue L**. 2015. Salicylic acid and reactive oxygen  
848 species interplay in the transcriptional control of defense genes expression. Frontiers in Plant  
849 Science **6**.
- 850 **Huang J, Zhao X, Bürger M, Wang Y, Chory J**. 2021. Two interacting ethylene response  
851 factors regulate heat stress response. The Plant Cell **33**, 338–357.
- 852 **Jeun YC, Sigrist J, Buchenauer H**. 2000. Biochemical and cytological studies on  
853 mechanisms of systemically induced resistance in tomato plants against *Phytophthora*  
854 *infestans*. Journal of Phytopathology **148**, 129–140.
- 855 **Kahlon PS, Seta SM, Zander G, Scheikl D, Hückelhoven R, Joosten MHJ, Stam, R.**  
856 2020. Population studies of the wild tomato species *Solanum chilense* reveal geographically

857 structured major gene-mediated pathogen resistance. Proceedings of the Royal Society B.  
858 **287**, 20202723.

859 **Kahlon PS, Stam R.** 2021a. Polymorphisms in plants to restrict losses to pathogens: From  
860 gene family expansions to complex network evolution. Current Opinion in Plant Biology **62**,  
861 102040.

862 **Kahlon PS, Stam R.** 2021b. Protocol for chemiluminescence based detection of ROS  
863 production in tomato. protocols.io. DOI: 10.17504/protocols.io.beejbbe

864 **Kahlon PS, Verin M, Hückelhoven R, Stam R.** 2021. Quantitative resistance differences  
865 between and within natural populations of *Solanum chilense* against the oomycete pathogen  
866 *Phytophthora infestans*. Ecology and Evolution **11**, ece3.7610.

867 **Kashyap SP, Kumari N, Mishra P, Prasad Moharana D, Aamir M, Singh B, Prasanna**  
868 **HC.** 2020. Transcriptional regulation-mediating ROS homeostasis and physio-biochemical  
869 changes in wild tomato (*Solanum chilense*) and cultivated tomato (*Solanum lycopersicum*)  
870 under high salinity. Saudi Journal of Biological Sciences **27**, 1999–2009.

871 **Katz E, Li J-J, Jaegle B, Ashkenazy H, Abrahams SR, Bagaza C, Holden S, Pires CJ,**  
872 **Angelovici R, Kliebenstein DJ.** 2021. Genetic variation, environment and demography  
873 intersect to shape *Arabidopsis* defense metabolite variation across Europe. eLife **10**, e67784.

874 **Kim D, Langmead B, Salzberg SL.** 2015. HISAT: a fast spliced aligner with low memory  
875 requirements. Nature Methods **12**, 357–360.

876 **Klarzynski O, Plesse B, Joubert J-M, Yvin J-C, Kopp M, Kloareg B, Fritig B.** 2000.  
877 Linear  $\beta$ -1,3 Glucans are elicitors of defense responses in tobacco. Plant Physiology **124**,  
878 1027–1038.

879 **Kruijt M, Kip DJ, Joosten MHAJ, Brandwagt BF, de Wit PJGM.** 2005. The *Cf-4* and *Cf-*  
880 *9* resistance genes against *Cladosporium fulvum* are conserved in wild tomato species.  
881 Molecular Plant-Microbe Interactions **18**, 1011–1021.

882 **Liao Y, Smyth GK, Shi W.** 2014. featureCounts: an efficient general purpose program for  
883 assigning sequence reads to genomic features. Bioinformatics **30**, 923–930.

884 **Liu Y, et al.** 2020a. Diverse Roles of the Salicylic Acid Receptors NPR1 and NPR3/NPR4 in  
885 Plant Immunity. The Plant Cell **32**, 4002–4016.

886 **Liu H, Xue X, Yu Y, Xu M, Lu C, Meng X, Zhang B, Ding X, Chu Z.** 2020b. Copper  
887 ions suppress abscisic acid biosynthesis to enhance defence against *Phytophthora infestans* in  
888 potato. Molecular Plant Pathology **21**, 636–651.

889 **Livak KJ, Schmittgen TD.** 2001. Analysis of relative gene expression data using real-time  
890 quantitative PCR and the  $2^{-\Delta\Delta CT}$  Method. Methods **25**, 402–408.

891 **Love MI, Huber W, Anders S.** 2014. Moderated estimation of fold change and dispersion  
892 for RNA-seq data with DESeq2. Genome Biology **15**, 550.

893 **Marshall-Colón A, Kliebenstein, DJ.** 2019. Plant Networks as Traits and Hypotheses:  
894 Moving Beyond Description. Trends in Plant Science **24**, 840–852.

- 895 **Meénard R, Alban S, de Ruffray P, Jamois F, Franz G, Fritig B, Yvin J-C, Kauffmann**  
896 **S.** 2004.  $\beta$ -1,3 Glucan sulfate, but Not  $\beta$ -1,3 Glucan, induces the salicylic acid signaling  
897 pathway in Tobacco and *Arabidopsis*. *The Plant Cell* **16**, 3020–3032.
- 898 **Ng LM, Melcher K, Teh BT, Xu HE.** 2014. Abscisic acid perception and signaling:  
899 structural mechanisms and applications. *Acta Pharmacologica Sinica* **35**, 567–584.
- 900 **Nie J, Yin Z, Li Z, Wu Y, Huang L.** 2019 A small cysteine-rich protein from two kingdoms  
901 of microbes is recognized as a novel pathogen-associated molecular pattern. *New Phytologist*  
902 **222**, 995–1011.
- 903 **Nosenko T, Böndel KB, Kumpfmüller G, Stephan W.** 2016. Adaptation to low  
904 temperatures in the wild tomato species *Solanum chilense*. *Molecular Ecology* **25**, 2853–  
905 2869.
- 906 **Ogran A, Landau N, Hanin N, Levy M, Gafni Y, Barazani O.** 2016. Intraspecific  
907 variation in defense against a generalist lepidopteran herbivore in populations of *Eruca*  
908 *sativa*(Mill.). *Ecology and Evolution* **6**, 363–374.
- 909 **Peng J, Deng X, Jia S, Huang J, Miao X, Huang Y.** 2004. Role of salicylic acid in tomato  
910 defense against cotton bollworm, *Helicoverpa armigera* Hubner. *Zeitschrift für*  
911 *Naturforschung C* **59**, 856–862.
- 912 **Pieterse CMJ, Leon-Reyes A, Van der Ent S, Van Wees SCM.** 2009. Networking by  
913 small-molecule hormones in plant immunity. *Nature Chemical Biology* **5**, 308–316.
- 914 **R Core Team**2020. R: The R Project for Statistical Computing.
- 915 **Raduski AR, Igić B.** 2021. Biosystematic studies on the status of *Solanum chilense*.  
916 *American Journal of Botany* **108**, 520–537.
- 917 **Ramirez-Prado JS, Abulfaraj AA, Rayapuram N, Benhamed M, Hirt H.** 2018. Plant  
918 immunity: from signaling to epigenetic control of defense. *Trends in Plant Science* **23**, 833–  
919 844.
- 920 **Riyazuddin R, Verma R, Singh K, Nisha N, Keisham M, Bhati KK, Kim ST, Gupta, R.**  
921 2020. Ethylene: a master regulator of salinity stress tolerance in plants. *Biomolecules* **10**,  
922 959.
- 923 **Roberts R, Mainiero S, Powell AF, Liu AE, Shi K, Hind SR, Strickler SR, Collmer A,**  
924 **Martin GB.** 2019. Natural variation for unusual host responses and flagellin-mediated  
925 immunity against *Pseudomonas syringae* in genetically diverse tomato accessions. *New*  
926 *Phytologist* **223**, 447–461.
- 927 **Sharaf EF, Farrag AA.** 2004. Induced resistance in tomato plants by IAA against *Fusarium*  
928 *oxysporum lycopersici*. *Polish Journal of Microbiology* **53**, 111–116.
- 929 **Shibata Y, Kawakita K, Takemoto D.** 2010. Age-related resistance of *Nicotiana*  
930 *benthamiana* against hemibiotrophic pathogen *Phytophthora infestans* requires both ethylene-  
931 and salicylic acid-mediated signaling pathways. *Molecular Plant-Microbe Interactions* **23**,  
932 1130–1142.

933

934 **Smith JM, Heese A.** 2014. Rapid bioassay to measure early reactive oxygen species  
935 production in *Arabidopsis* leave tissue in response to living *Pseudomonas syringae*. Plant  
936 Methods **10**, 6.

937 **Soltis NE, Atwell S, Shi G, Fordyce R, Gwinner R, Gao D, Shafi A, Kliebenstein DJ.**  
938 2019. Interactions of tomato and *Botrytis cinerea* genetic diversity: parsing the contributions  
939 of host differentiation, domestication, and pathogen variation. The Plant Cell **31**, 502–519.

940 **Song W, Ma X, Tan H, Zhou J.** 2011. Abscisic acid enhances resistance to *Alternaria*  
941 *solanii* in tomato seedlings. Plant Physiology and Biochemistry **49**, 693–700.

942 **Stam R, Scheikl D, Tellier A.** 2017. The wild tomato species *Solanum chilense* shows  
943 variation in pathogen resistance between geographically distinct populations. PeerJ **5**, e2910.

944 **Stam R, Silva-Arias GA, Tellier A.** 2019a. Subsets of *NLR* genes show differential  
945 signatures of adaptation during colonization of new habitats. New Phytologist **224**, 367–379.

946 **Stam R, Nosenko T, Hörger AC, Stephan W, Seidel M, Kuhn JMM, Haberer G, Tellier,**  
947 **A.** 2019b. The *de Novoreference* genome and transcriptome assemblies of the wild tomato  
948 species *Solanum chilense* highlights birth and death of *NLR* genes between tomato species.  
949 G3: Genes, Genomes, Genetics **9**, 3933–3941.

950 **Steidle C. Stam R.** 2021. Multi-omics approach highlights differences between functional  
951 RLP classes in *Arabidopsis thaliana*. BMC Genomics **22**, 557.

952 **Takemoto D, Shibata Y, Ojika M, Mizuno Y, Imano S, Ohtsu M, Sato I, Chiba S,**  
953 **Kawakita K, Rin S, Camagna M.** 2018. Resistance to *Phytophthora infestans*: exploring  
954 genes required for disease resistance in Solanaceae plants. Journal of General Plant Pathology  
955 **84**, 312–320.

956 **Tian ZD, Liu J, Wang BL, Xie CH.** 2006. Screening and expression analysis of  
957 *Phytophthora infestans* induced genes in potato leaves with horizontal resistance. Plant Cell  
958 Reports **25**, 1094–1103.

959 **Torres MA.** 2010. ROS in biotic interactions. Physiologia Plantarum **138**, 414–429.

960 **Torres MA, Jones JDG, Dangl JL.** 2006. Reactive oxygen species signaling in response to  
961 pathogens. Plant Physiology **141**, 373–378.

962 **Tziros GT, Samaras A, Karaoglanidis GS.** 2021. Laminarin induces defense responses and  
963 efficiently controls olive leaf spot disease in olive. Molecules **26**, 1043.

964 **Ueeda M, Kubota M, Nishi K.** 2005. Contribution of jasmonic acid to resistance against  
965 *Phytophthora* blight in *Capsicum annuum* cv. SCM334. Physiological and Molecular Plant  
966 Pathology **67**, 149–154.

967 **Van der Hoorn RAL, Kruijt M, Roth R, Brandwagt BF, Joosten MHAJ, Wit PJGMD.**  
968 2001. Intragenic recombination generated two distinct *Cf* genes that mediate AVR9  
969 recognition in the natural population of *Lycopersicon pimpinellifolium*. Proceedings of the  
970 National Academy of Sciences of the United States of America **98**, 10493–10498.



- 971 **Van de Weyer A-L, Monteiro F, Furzer OJ, Nishimura MT, Cevik V, Witek K, Jones**  
972 **JDG, Dangl JL, Weigel D, Bemm F.** 2019. A species-wide inventory of *NLR* genes and  
973 alleles in *Arabidopsis thaliana*. *Cell* **178**, 1260-1272.e14.
- 974 **VanderPlank JEV .** 1963. *Plant Diseases: Epidemics and Control*. Academic Press.
- 975 **Velásquez AC, Oney M, Huot B, Xu S, He SY.** 2017. Diverse mechanisms of resistance to  
976 *Pseudomonas syringae* in a thousand natural accessions of *Arabidopsis thaliana*. *New*  
977 *Phytologist* **214**, 1673–1687.
- 978 **Von Kruedener S, Schempp H, Elstner EF.** 1995. Gas chromatographic differentiation  
979 between myeloperoxidase activity and fenton-type oxidants. *Free Radical Biology and*  
980 *Medicine* **19**, 141–146.
- 981 **Wang L, et al.** 2019. *Arabidopsis UBC 13* differentially regulates two programmed cell death  
982 pathways in responses to pathogen and low-temperature stress. *New Phytologist* **221**, 919–  
983 934.
- 984 **Wanke A, Rovenich H, Schwanke F, Velte S, Becker S, Hehemann J-H, Wawra S,**  
985 **Zuccaro A.** 2020. Plant species-specific recognition of long and short  $\beta$ -1,3-linked glucans is  
986 mediated by different receptor systems. *The Plant Journal* **102**, 1142–1156.
- 987 **Windram O, Denby KJ.** 2015. Modelling signaling networks underlying plant defence.  
988 *Current Opinion in Plant Biology* **27**, 165–171.
- 989 **Winkelmüller TM, et al.** 2021. Gene expression evolution in pattern-triggered immunity  
990 within *Arabidopsis thaliana* and across Brassicaceae species. *The Plant Cell*, koab073.
- 991 **Witek K, et al.** 2021. A complex resistance locus in *Solanum americanum* recognizes a  
992 conserved *Phytophthora* effector. *Nature Plants* **7**, 198–208.
- 993 **Xin Z, Cai X, Chen S, Luo Z, Bian L, Li Z, Ge L, Chen Z.** 2019. A disease resistance  
994 elicitor laminarin enhances tea defense against a piercing herbivore *Empoasca*  
995 (*Matsumurasca*)onukii Matsuda. *Scientific Reports* **9**, 814.
- 996 **Yang L, Zu Y-G, Tang Z-H.** 2013. Ethylene improves *Arabidopsis* salt tolerance mainly via  
997 retaining  $K^+$  in shoots and roots rather than decreasing tissue  $Na^+$  content. *Environmental and*  
998 *Experimental Botany* **86**, 60–69.
- 999 **Yang X, Chen L, Yang Y, Guo X, Chen G, Xiong X, Dong D, Li G.** 2020. Transcriptome  
1000 analysis reveals that exogenous ethylene activates immune and defense responses in a high  
1001 late blight resistant potato genotype. *Scientific Reports* **10**, 21294.
- 1002
- 1003 **Zhao Z et al.** 2021. RPW8.1 enhances the ethylene-signaling pathway to feedback-attenuate  
1004 its mediated cell death and disease resistance in *Arabidopsis*. *New Phytologist* **229**, 516–531.
- 1005 **Zhu J-K.** 2002. Salt and drought stress signal transduction in plants. *Annual Review of Plant*  
1006 *Biology*. **53**, 247–273.
- 1007
- 1008
- 1009

1010  
1011  
1012  
1013
